# Supplementary material for: Distinct Outcomes of Oropharyngeal Squamous Cell Carcinoma Patients after Distant Failure According to p16 Status: Implication in Therapeutic Options
Source: MDPI journal article supplement (doi:10.3390/curroncol28030156), 2021-04-29
Supplement: s1 [file s1]

Figure S1. Patient 1

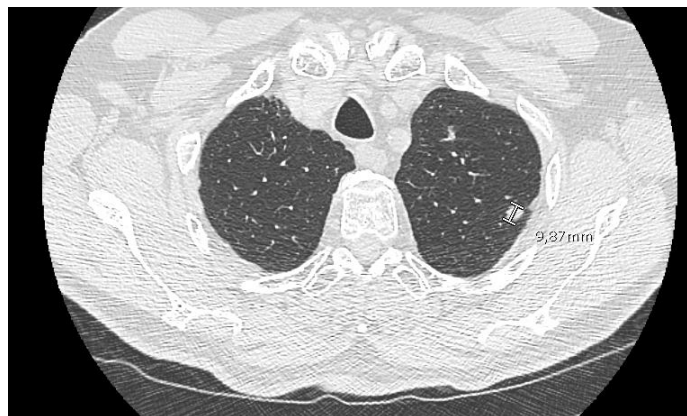

1.A TDM June 2014

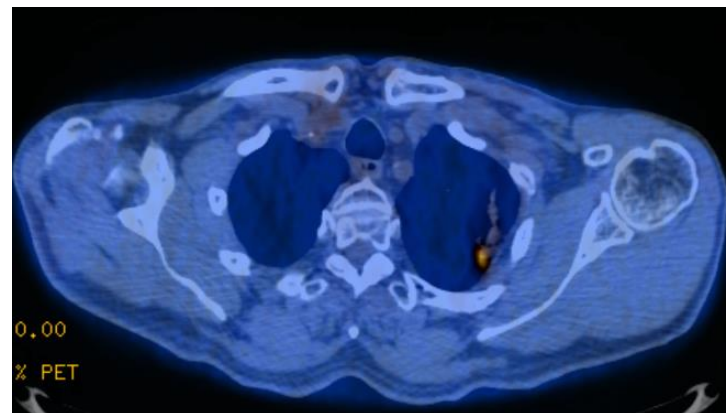

1.B FDG TEP July 2014

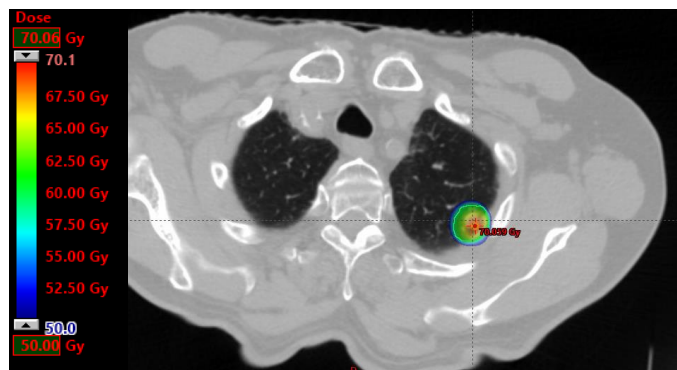

1.C SBRT planification 55 Gy in 5 fractions September 2014

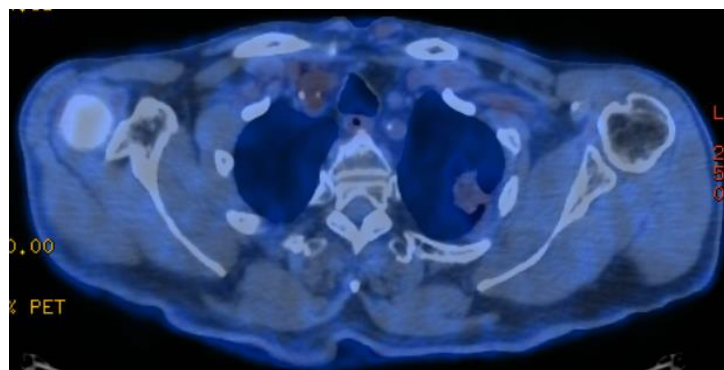

1.D FDG TEP September 2019

Figure S2. Patient 2

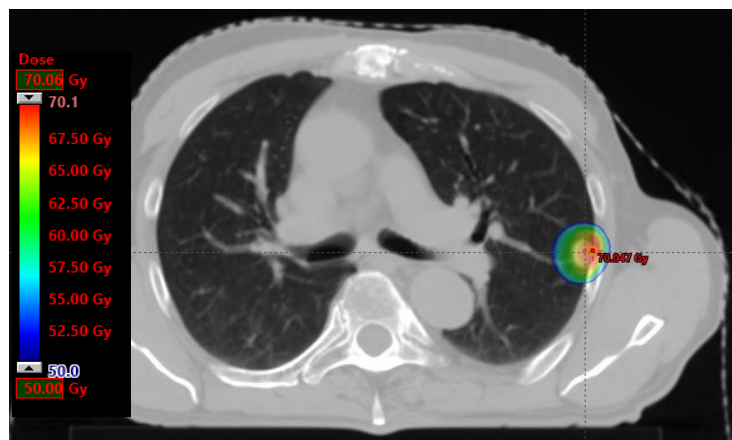

2.A SBRT planification 55 Gy in 5 fractions October 2015

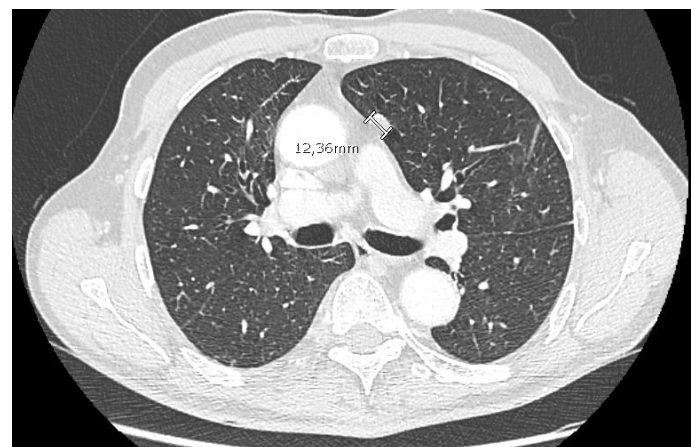

2.B para mediastinal metastasis September 2016

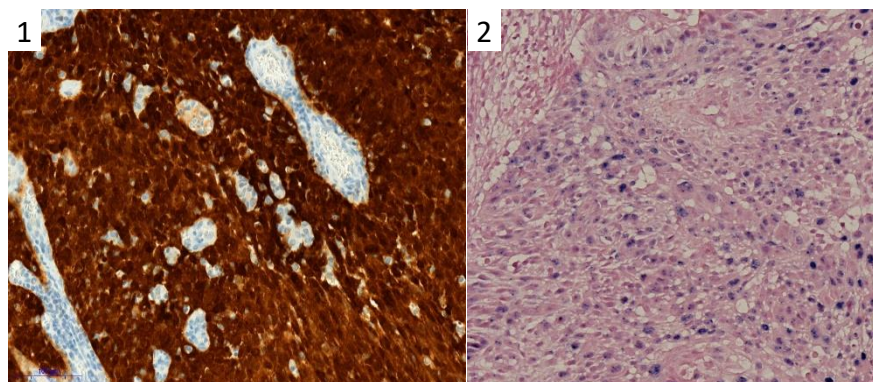

2.C Mediastinal resection November 2016 : p16 IHC overexpression (1) and HPV high risk overexpression CISH (2)

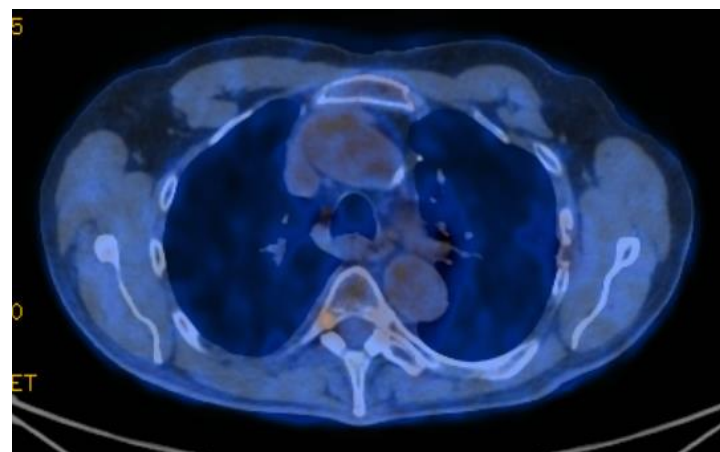

2.D FDG TEP January 2020



Figure S3. Patient 3

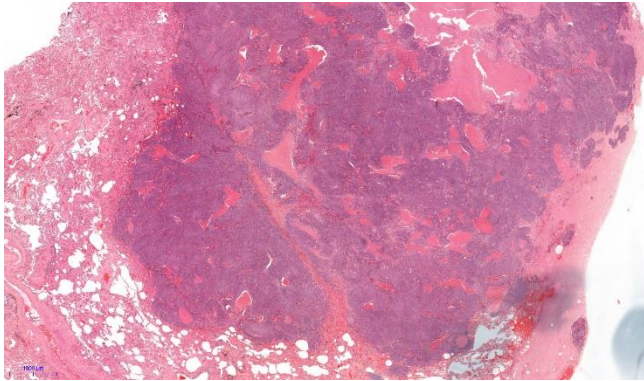

3.A Hematoxylin Eosin of one right inferior lobar metastase December 2013

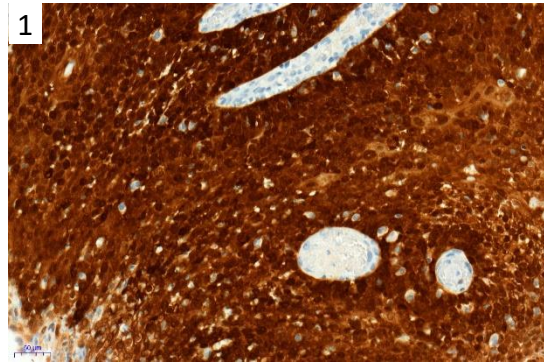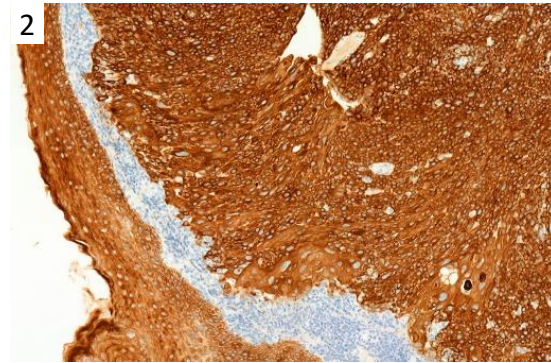

3.B January 2014 lung ( 1) and oropharyngeal (2) p16 IHC overexpression

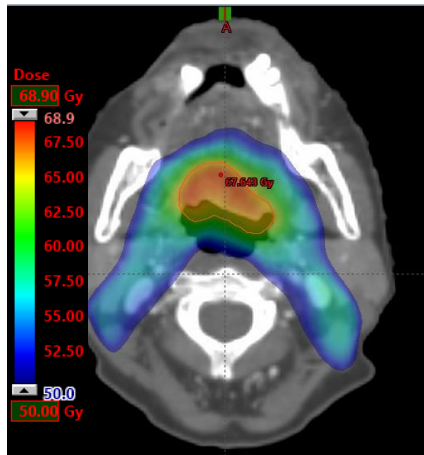

3.C OSCC RT planification 66 Gy in 30 fractions April 2014

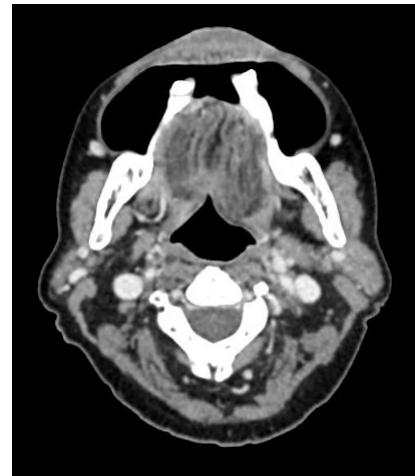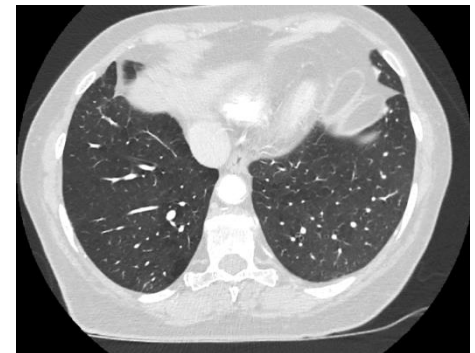

3.D Complete response November 2018
